# Supplementary material for: Mass Spectrometry-Based Quantification of the Antigens in Aluminum Hydroxide-Adjuvanted Diphtheria-Tetanus-Acellular-Pertussis Combination Vaccines
Source: MDPI journal article supplement (doi:10.3390/vaccines10071078), 2022-07-05
Supplement: s1 [file s1]

## Supplementary Data

**Table S1. Sequences of candidate signature peptides for antigen quantification.**

| <b>DTd</b> |                                |                            |                                      |                                                    |
|------------|--------------------------------|----------------------------|--------------------------------------|----------------------------------------------------|
|            | <b>Sequence</b>                | <b>Position in antigen</b> | <b>MH<sup>+</sup> (monoisotopic)</b> | <b>Antigen intensity with 1:20 w/w Asp-N ratio</b> |
| Pep_DTd_01 | DSIIRTGFQGEGSH                 | 404-417                    | 1503.7187                            | 1.22E8                                             |
| Pep_DTd_02 | DSIGVLGYQKTV                   | 539-550                    | 1279.6892                            | 7.58E7                                             |
| Pep_DTd_03 | DAAGYSV <sup>2</sup>           | 62-68                      | 682.3042                             | NF                                                 |
| Pep_DTd_04 | DSETA <sup>1</sup>             | 291-295                    | 522.2042                             | 6.27E5                                             |
| Pep_DTd_05 | DHTKVNSKLSLFFEIKS <sup>2</sup> | 520-536                    | 1993.0753                            | NF                                                 |
| <b>TTd</b> |                                |                            |                                      |                                                    |
| Pep_TTd_01 | DLYEKTIN                       | 290-297                    | 995.5044                             | 3.64E7                                             |
| Pep_TTd_02 | DTEGFNIESK                     | 396-405                    | 1139.5215                            | 5.81E7                                             |
| Pep_TTd_03 | DPNYLRT                        | 74-80                      | 878.4367                             | 1.02E7                                             |
| Pep_TTd_04 | DTEYYLIPVASSSK                 | 1125-1138                  | 1572.7792                            | 1.90E7                                             |
| Pep_TTd_05 | DPVKIPNLL                      | 381-389                    | 1008.6088                            | 4.68E6                                             |
| Pep_TTd_06 | DVQLKNIT                       | 1139-1146                  | 930.5255                             | 2.85E7                                             |
| <b>FHA</b> |                                |                            |                                      |                                                    |
| Pep_FHA_01 | DAGLAGPSAVAAPAVGAA             | 2305-2322                  | 1465.7645                            | 3.92E7                                             |
| Pep_FHA_02 | DVGLEKRL                       | 2214-2221                  | 929.5415                             | 9.61E7                                             |
| Pep_FHA_03 | DATLTLAQGTQR                   | 1661-1672                  | 1274.6699                            | 2.69E7                                             |
| Pep_FHA_04 | DLTAEQSLIEVGK                  | 1855-1867                  | 1402.7424                            | 5.80E7                                             |
| Pep_FHA_05 | DLRTVYAKQA                     | 2076-2085                  | 1164.6372                            | 4.43E7                                             |
| <b>PTd</b> |                                |                            |                                      |                                                    |
| Pep_PTd_01 | DGTPGGAF                       | 309-316                    | 721.3151                             | 5.84E7                                             |
| Pep_PTd_02 | DSPYPGTPG                      | 772-780                    | 890.3890                             | 5.70E7                                             |
| Pep_PTd_03 | DNNFYGAASSYFEYV                | 68-82                      | 1746.7282                            | 7.92E6                                             |
| Pep_PTd_04 | DGTYLGGEYGGVIK                 | 295-308                    | 1428.7005                            | 1.98E7                                             |
| Pep_PTd_05 | DAGHEH <sup>1,2</sup>          | 740-745                    | 665.2638                             | NF                                                 |

<sup>1</sup>Not antigen-specific

<sup>2</sup>peptides not suitable as target peptide based on intensity

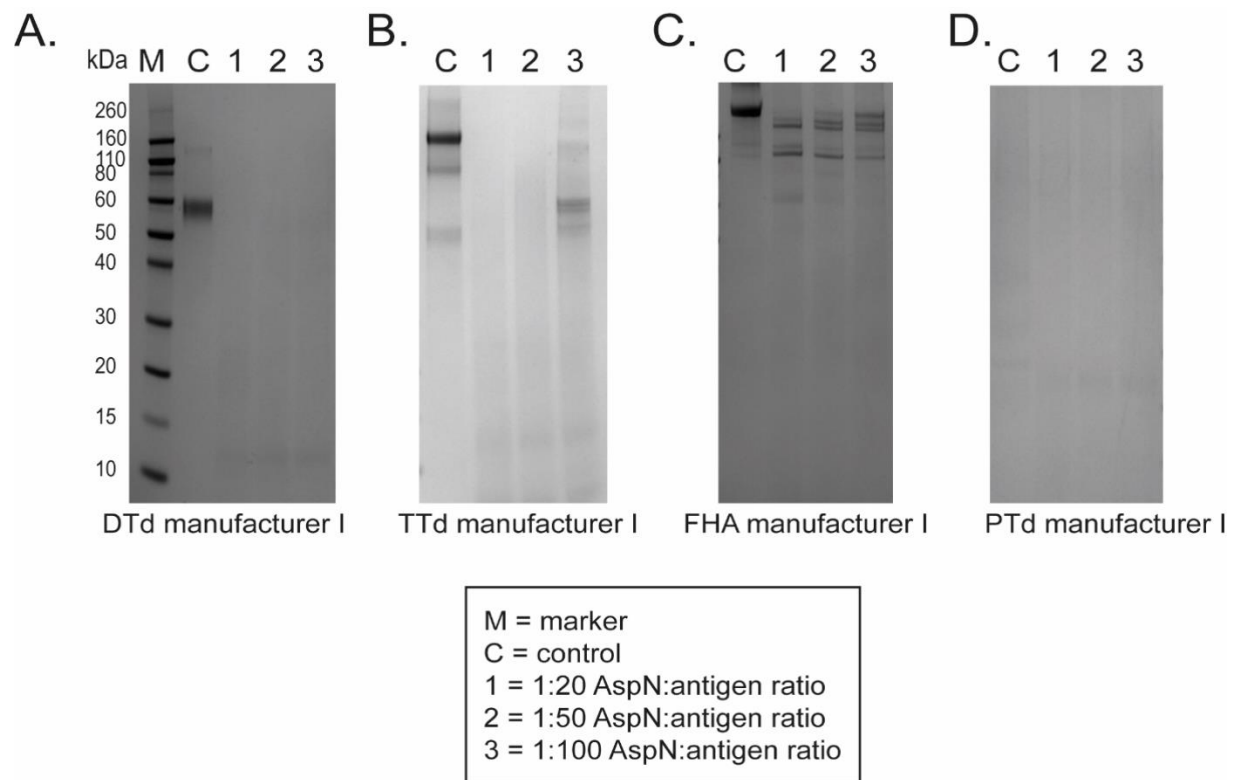

**Figure S1. SDS-PAGE results digestion of DTd, TTd, FHA and PTd using different enzyme-to-substrate ratios.** Non-adjuvanted samples of individual DTd (A.), TTd (B.), FHA (C.) and PTd (D.) antigens were analyzed.

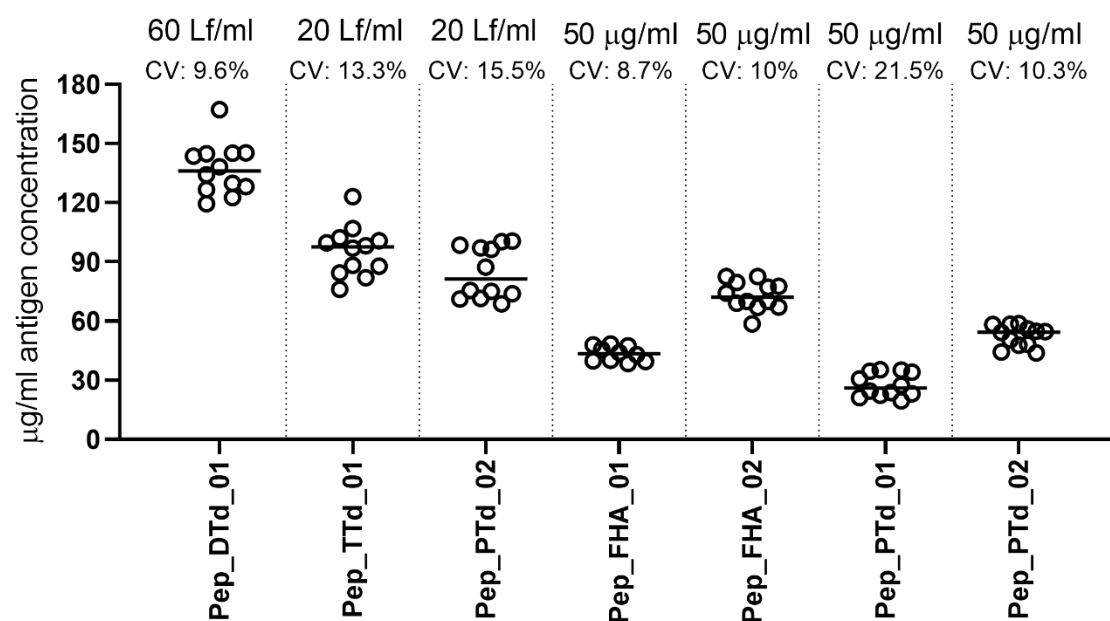

**Figure S2. Quantification of antigens in a second batch of DTaP vaccine.** The used signature peptides are shown on the X-axis and the antigen concentrations are plotted on the Y-axis. To determine the amount of antigen present in vaccine A batch 2, 100 pmol of each internal standard peptide was added to 100 µl vaccine and digested with 0.33 µg Asp-N (n=12 per signature peptide, except for peptide 4, n=10).
